# Supplementary material for: Predicting Breast Cancer in Chinese Women Using Machine Learning Techniques: Algorithm Development
Source: PubMed Central journal article supplement (PMC7308891; doi:10.2196/17364), 2020-06-08
Supplement: medinform_v8i6e17364_app1.pdf [file medinform_v8i6e17364_app1.pdf]

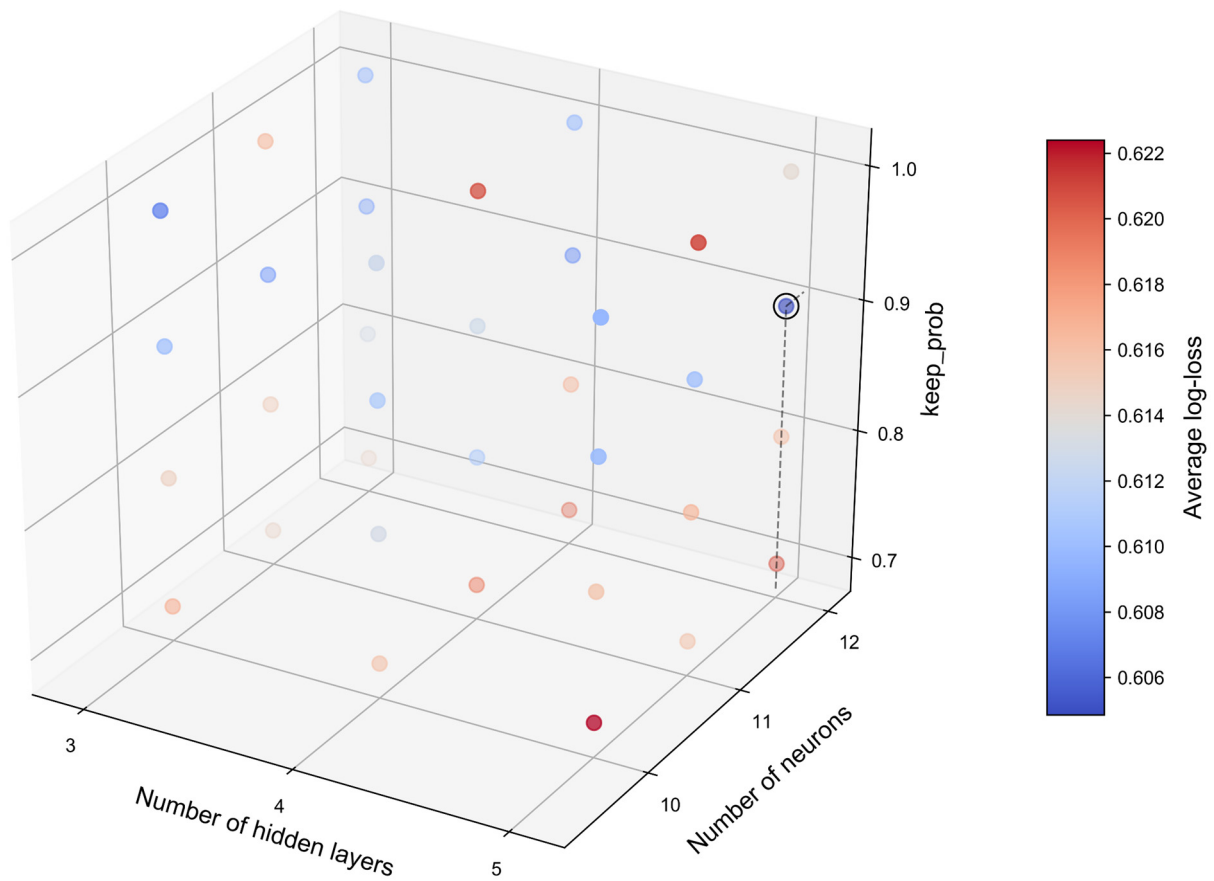

**Figure: Results of the hyper-parameters tuning (Deep Neural Network)**

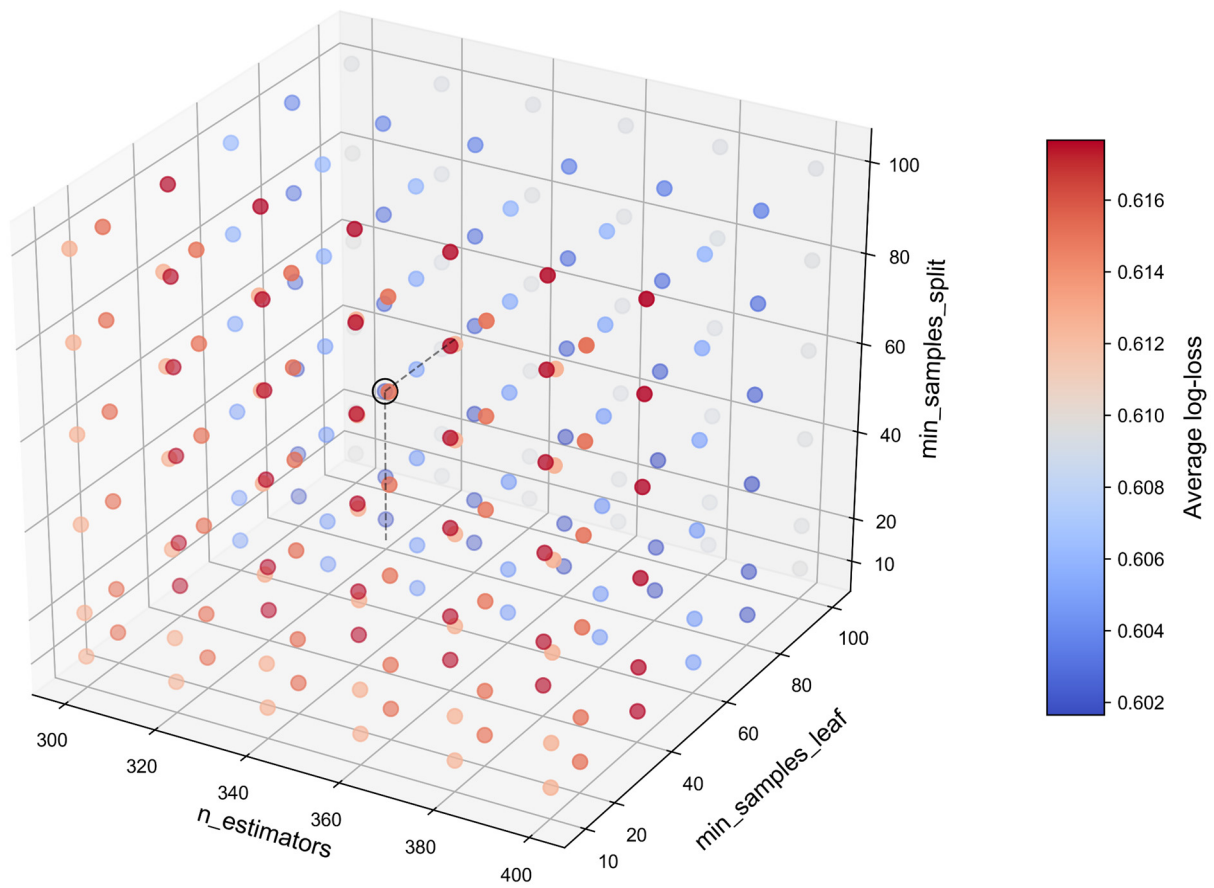

**Figure: Results of the hyper-parameters tuning (Random Forests)**

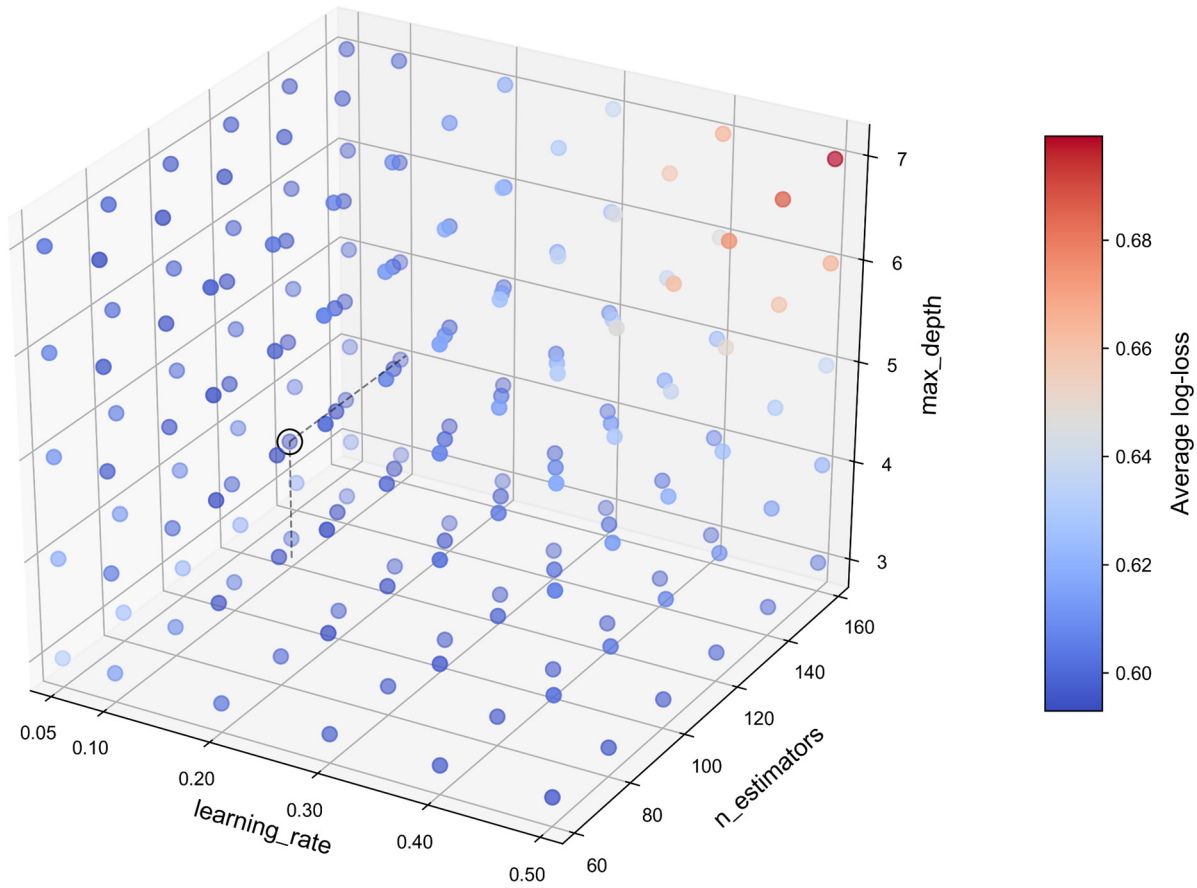

**Figure: Results of the hyper-parameters tuning (Extreme Gradient Boosting-1)**

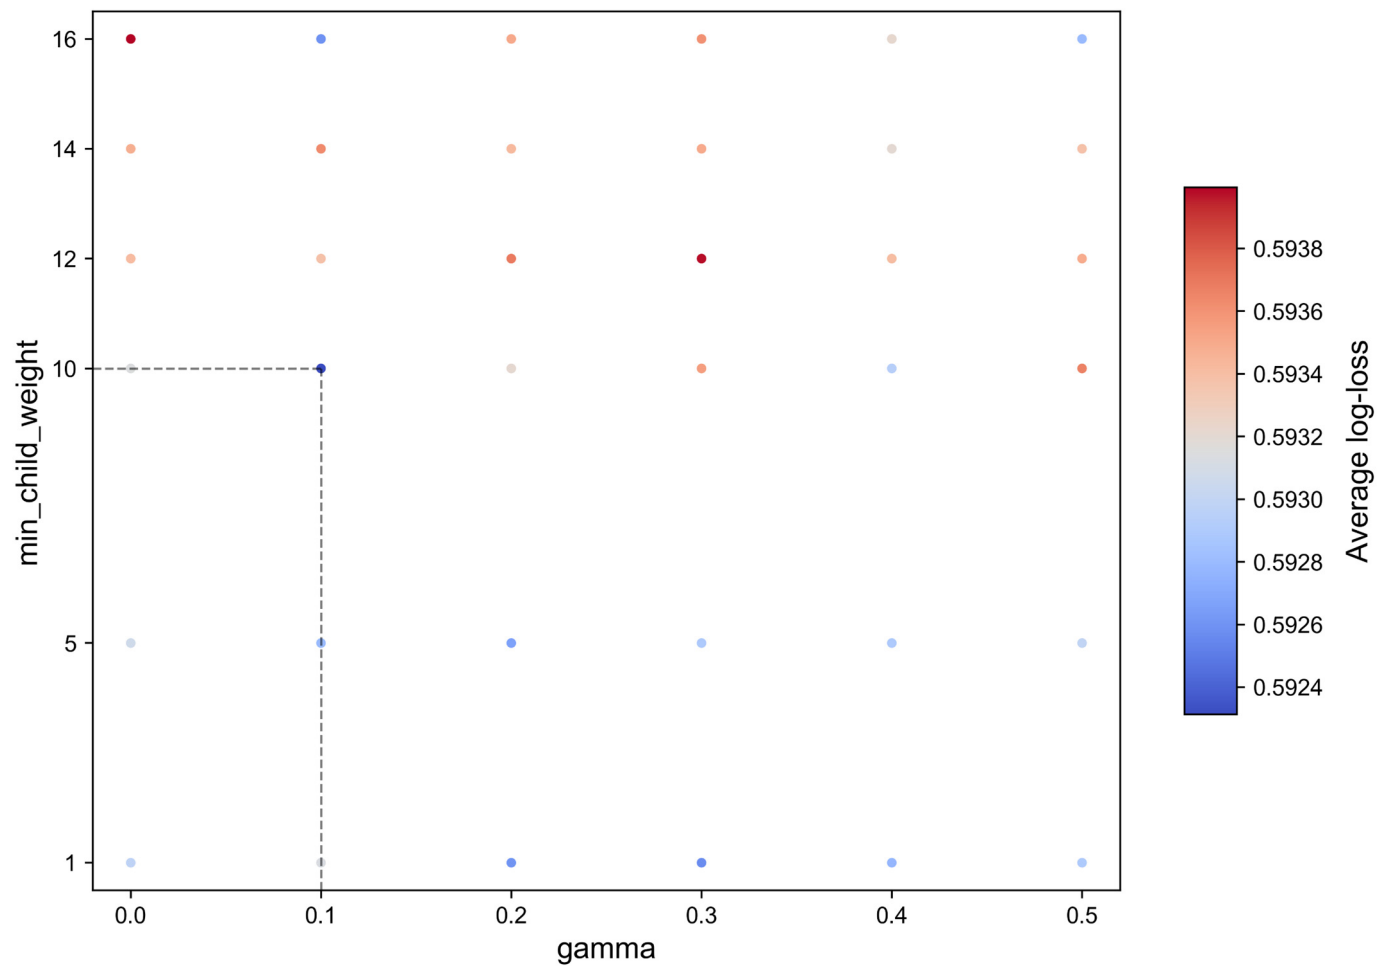

**Figure: Results of the hyper-parameters tuning (Extreme Gradient Boosting-2)**

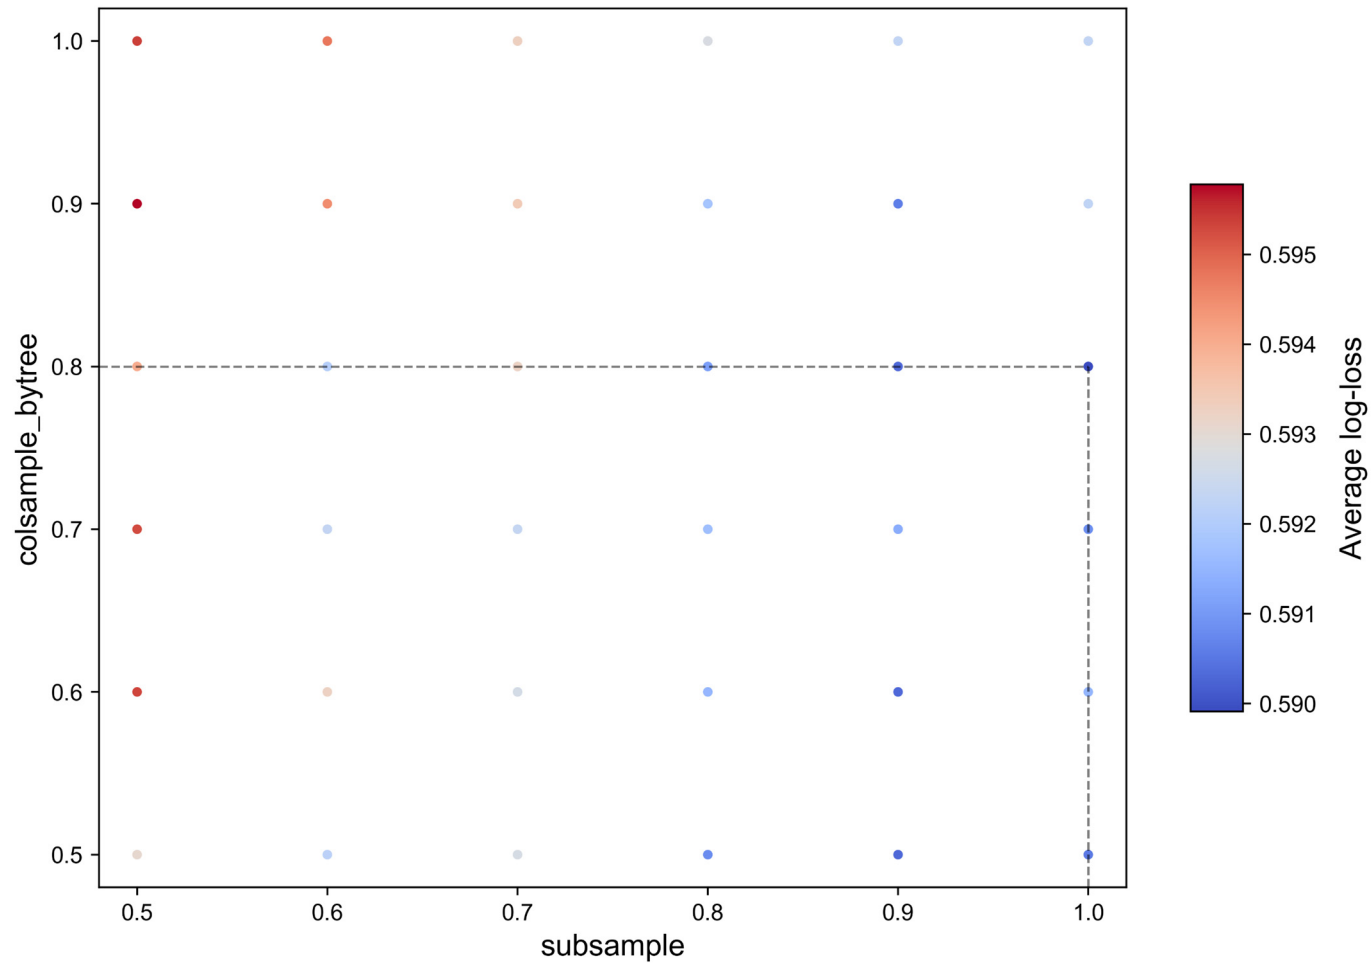

**Figure: Results of the hyper-parameters tuning (Extreme Gradient Boosting-3)**

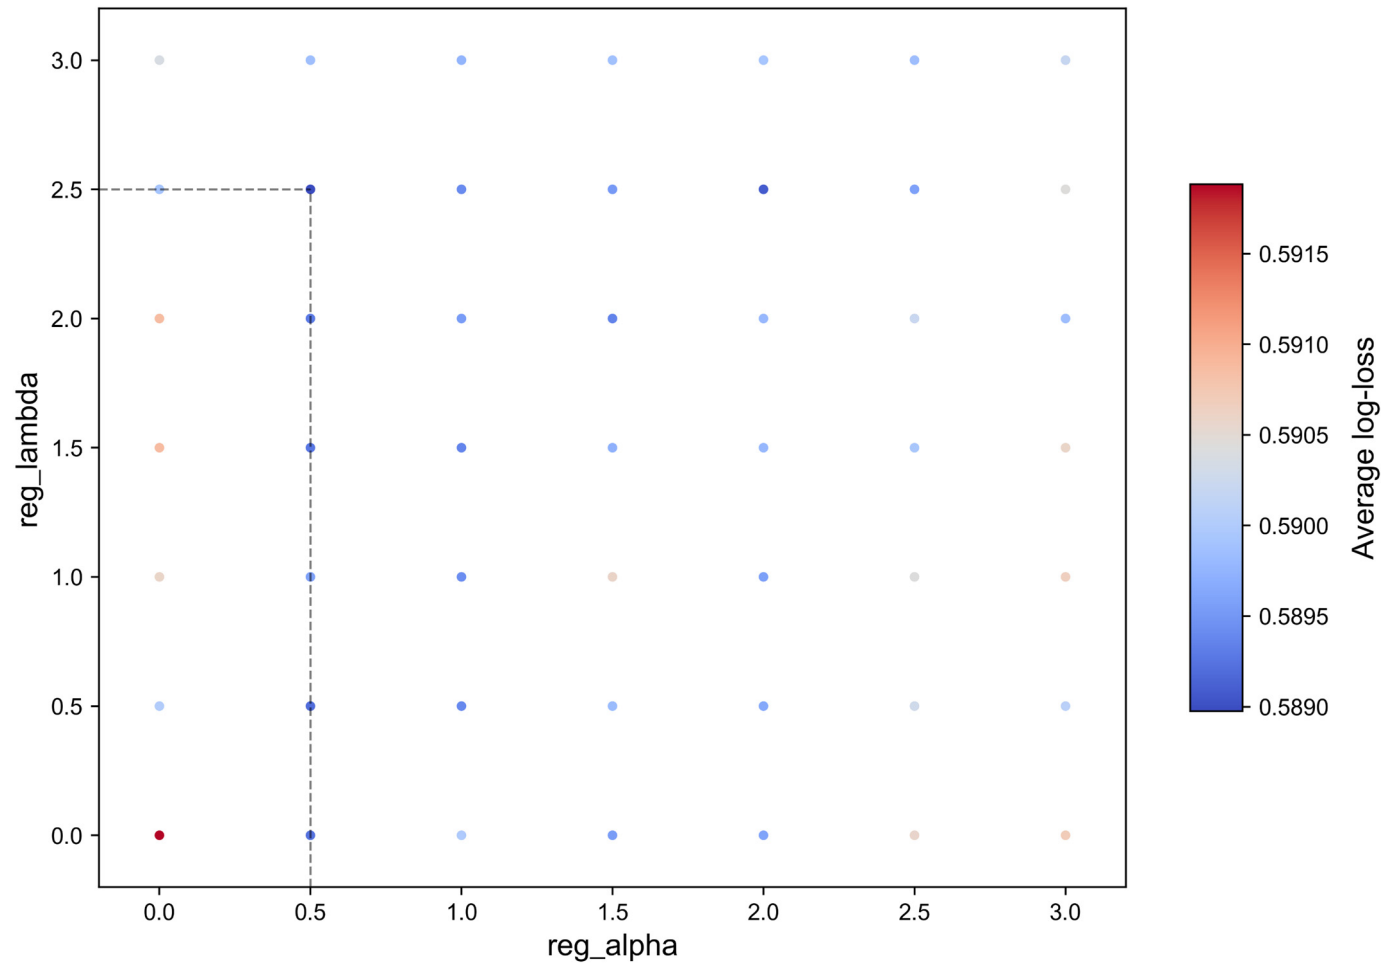

**Figure: Results of the hyper-parameters tuning (Extreme Gradient Boosting-4)**

**Table: Configuration of hyper-parameters in each machine-learning algorithm (hyper-parameters that were tuned are highlighted in red)**

| Machine-learning algorithm | Hyper-parameter name                                   | Description                                                                            | Value                |
|----------------------------|--------------------------------------------------------|----------------------------------------------------------------------------------------|----------------------|
| Random Forest†             | criterion                                              | Function to measure the quality of a split                                             | Gini                 |
|                            | n_estimators                                           | Number of trees in the forest                                                          | 320                  |
|                            | max_depth                                              | Maximum depth of the tree                                                              | None                 |
|                            | min_samples_split                                      | Minimum number of samples required to split an internal node                           | 40                   |
|                            | min_samples_leaf                                       | Minimum number of samples required to be at a leaf node                                | 80                   |
|                            | max_features                                           | Number of features to consider when looking for the best split                         | $\sqrt{n\_features}$ |
|                            | min_weight_fraction_leaf                               | minimum weighted fraction of the sum total of weights                                  | 0                    |
| Extreme Gradient Boosting‡ | max_depth                                              | Maximum tree depth for base learners                                                   | 4                    |
|                            | learning_rate                                          | Boosting learning rate                                                                 | 0.1                  |
|                            | n_estimators                                           | Number of boosted trees to fit                                                         | 120                  |
|                            | objective                                              | learning task and the corresponding learning objective                                 | binary:logistic      |
|                            | booster                                                | Which booster to use                                                                   | gbtree               |
|                            | gamma                                                  | Minimum loss reduction required to make a further partition on a leaf node of the tree | 0.1                  |
|                            | min_child_weight                                       | Minimum sum of instance weight(hessian) needed in a child                              | 10                   |
|                            | max_delta_step                                         | Maximum delta step we allow each tree's weight estimation to be                        | 0                    |
|                            | subsample                                              | Subsample ratio of the training instance                                               | 1.0                  |
|                            | colsample_bytree                                       | Subsample ratio of columns when constructing each tree                                 | 0.8                  |
|                            | reg_alpha                                              | L1 regularization term on weights                                                      | 0.5                  |
|                            | reg_lambda                                             | L2 regularization term on weights                                                      | 2.5                  |
| scale_pos_weight           | Balancing of positive and negative weights             | 1                                                                                      |                      |
| base_score                 | Initial prediction score of all instances, global bias | 0.5                                                                                    |                      |

|                                  | missing       | Value in the data which needs to be present as a missing value                                        | None                                                       |
|----------------------------------|---------------|-------------------------------------------------------------------------------------------------------|------------------------------------------------------------|
| (Continued)                      |               |                                                                                                       |                                                            |
| Logistic Regression <sup>†</sup> | penalty       | Norm used in the penalization                                                                         | none                                                       |
|                                  | C             | Inverse of regularization strength                                                                    | NA                                                         |
|                                  | tol           | Tolerance for stopping criteria                                                                       | 0.0001                                                     |
| Deep Neural Network <sup>§</sup> | -             | Number of hidden layers                                                                               | 5                                                          |
|                                  | -             | Number of neurons in each hidden layer                                                                | 12                                                         |
|                                  | -             | Activation function in the hidden layers                                                              | Leaky ReLU                                                 |
|                                  | -             | Activation function in the output layer                                                               | sigmoid                                                    |
|                                  | -             | Loss function                                                                                         | sigmoid cross entropy                                      |
|                                  | -             | Optimizer                                                                                             | Adam optimizer                                             |
|                                  | -             | Number of iterations                                                                                  | 5000                                                       |
|                                  | learning_rate | Learning rate                                                                                         | $0.01 \times 0.95^{\lfloor \frac{iteration}{500} \rfloor}$ |
|                                  | keep_prob     | With probability keep_prob, outputs the input element scaled up by 1 / keep_prob, otherwise outputs 0 | 0.9 in model training and 1.0 in model testing             |

<sup>†</sup> Implemented in Python 3.6 using scikit-learn (version 0.20.0)

<sup>‡</sup> Implemented in Python 3.6 using xgboost (version 0.80)

<sup>§</sup> Implemented in Python 3.6 using TensorFlow (version 1.10.0)
