# Supplementary material for: Predicting Breast Cancer in Chinese Women Using Machine Learning Techniques: Algorithm Development
Source: PubMed Central journal article supplement (PMC7308891; doi:10.2196/17364), 2020-06-08
Supplement: medinform_v8i6e17364_app3.pdf [file medinform_v8i6e17364_app3.pdf]

- Hyper-parameters tuning for each ML algorithm using grid search and 10-fold cross-validation (final configuration of hyper-parameters for each ML algorithm is shown in Supplemental File 1)
- For K = 1 to 10:
  - Randomly divide the dataset into 5 folds with approximately equal sample size
  - For J = 1 to 5 (5-fold cross-validation):
    - ◆ Choose the J<sub>th</sub> fold as validation set and the remaining four folds as training set
    - ◆ Develop four ML models (XGBoost, RF, DNN and LR) using the training set
    - ◆ Calculate AUC (AUC<sub>0</sub>) for each ML model using the validation set
    - ◆ For I = 1 to 10:
      - ◇ Permute the values of the I<sub>th</sub> variable in the testing set and calculate the corresponding AUC (AUC<sub>i</sub>) for each ML model
      - ◇ Calculate AUC decrease for the I<sub>th</sub> variable for each ML model:  $1 - \frac{AUC_i}{AUC_0}$
- Calculate the mean decrease in AUC for each variable and each ML algorithm
- Ranking each variable in the four ML algorithms according to their mean decrease in AUC
