# Supplementary material for: Predicting Breast Cancer in Chinese Women Using Machine Learning Techniques: Algorithm Development
Source: PubMed Central journal article supplement (PMC7308891; doi:10.2196/17364), 2020-06-08
Supplement: medinform_v8i6e17364_app4.pdf [file medinform_v8i6e17364_app4.pdf]

| Comparison      | AUC        |                      | Sensitivity |                      | Specificity |                      | Accuracy   |                      |
|-----------------|------------|----------------------|-------------|----------------------|-------------|----------------------|------------|----------------------|
|                 | Difference | P-value <sup>†</sup> | Difference  | P-value <sup>‡</sup> | Difference  | P-value <sup>‡</sup> | Difference | P-value <sup>‡</sup> |
| DNN vs. LR      | 0.097      | <0.001 <sup>†</sup>  | 0.146       | <0.001 <sup>†</sup>  | 0.018       | 0.35                 | 0.083      | <0.001 <sup>†</sup>  |
| XGBoost vs. LR  | 0.111      | <0.001 <sup>†</sup>  | 0.16        | <0.001 <sup>†</sup>  | 0.025       | 0.02                 | 0.093      | <0.001 <sup>†</sup>  |
| RF vs. LR       | 0.097      | <0.001 <sup>†</sup>  | 0.154       | <0.001 <sup>†</sup>  | 0.016       | 0.17                 | 0.085      | <0.001 <sup>†</sup>  |
| XGBoost vs. DNN | 0.014      | <0.001 <sup>†</sup>  | 0.014       | 0.45                 | 0.007       | 0.71                 | 0.01       | 0.002 <sup>†</sup>   |
| DNN vs. RF      | 0          | 0.98                 | -0.008      | 0.64                 | 0.002       | 0.90                 | -0.002     | 0.34                 |
| XGBoost vs. RF  | 0.014      | <0.001 <sup>†</sup>  | 0.006       | 0.28                 | 0.009       | 0.15                 | 0.008      | 0.01                 |

<sup>†</sup> A P-value < 0.008 is considered to be statistically significant

<sup>‡</sup> P-values were derived from the pair-wise corrected resampled t-test
